# Supplementary material for: Structural basis of nSH2 regulation and lipid binding in PI3Kα
Source: PubMed Central journal article supplement (PMC4170646; doi:10.18632/oncotarget.2263), 2014-07-25
Supplement: oncotarget-05-5198-s001.pdf [file oncotarget-05-5198-s001.pdf]

## Structural basis of nSH2 regulation and lipid binding in PI3K $\alpha$

### Supplementary Materials

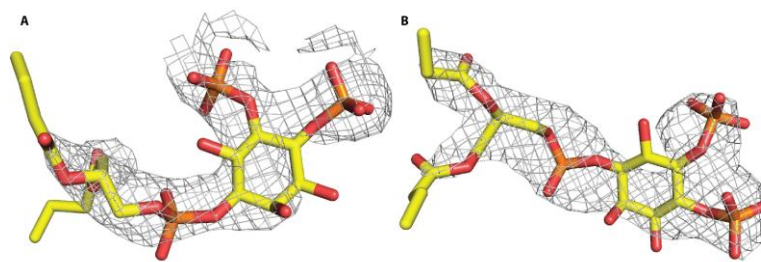

**Figure S1: Electron density maps for the two PIP<sub>2</sub> molecules.** (A) Electron density map ( $2F_O - F_C$  at  $\sigma=1$ ) for the substrate PIP<sub>2</sub>. (B) Electron density map ( $2F_O - F_C$  at  $\sigma=1$ ) for the second PIP<sub>2</sub> molecule, which binds at the interface between the ABD, iSH2 and kinase domains.

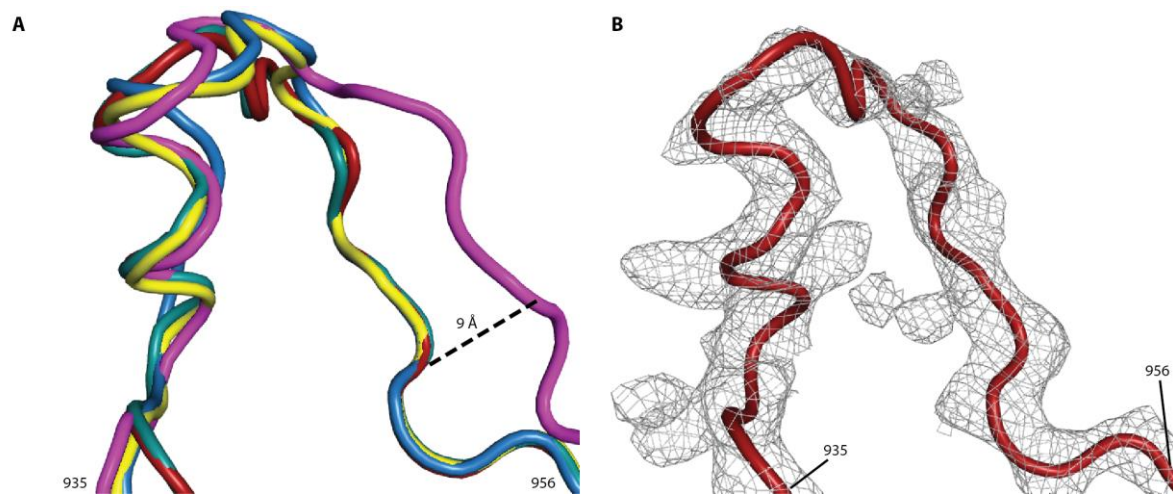

**Figure S2: Alignment of activation loops from PI3K $\alpha$  structures.** 4OVU is shown in teal, 4OVV is shown in red, 4JPS is shown in blue, 4L1B is shown in yellow, 4A55 is shown in magenta. All the PI3K $\alpha$  structures have the activation loop in a similar conformation, with the exception of 4A55, which is influenced by inhibitor binding in the structure.

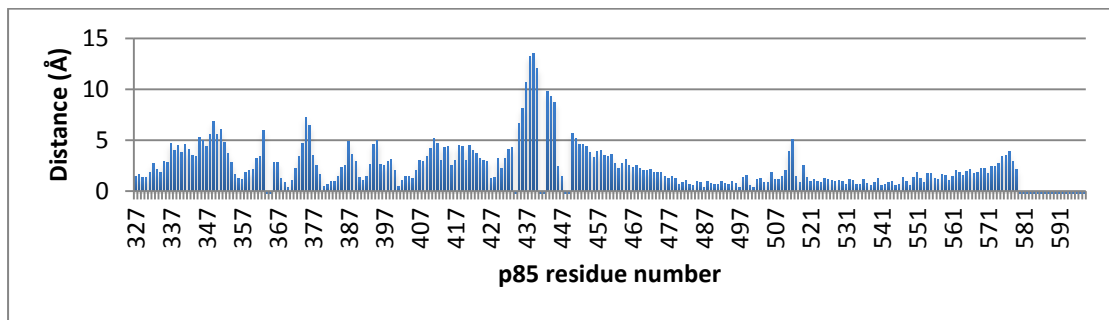

**Figure S3: Distance plots.** Distance plots of the distance between p85 $\alpha$  C $\alpha$  atoms of wild-type p110 $\alpha$ /niSH2 (PDB ID: 4OVU) and H1047R p110 $\alpha$ /niSH2 (PDB ID: 3HHM) aligned by C $\alpha$  atoms of p110 $\alpha$ .

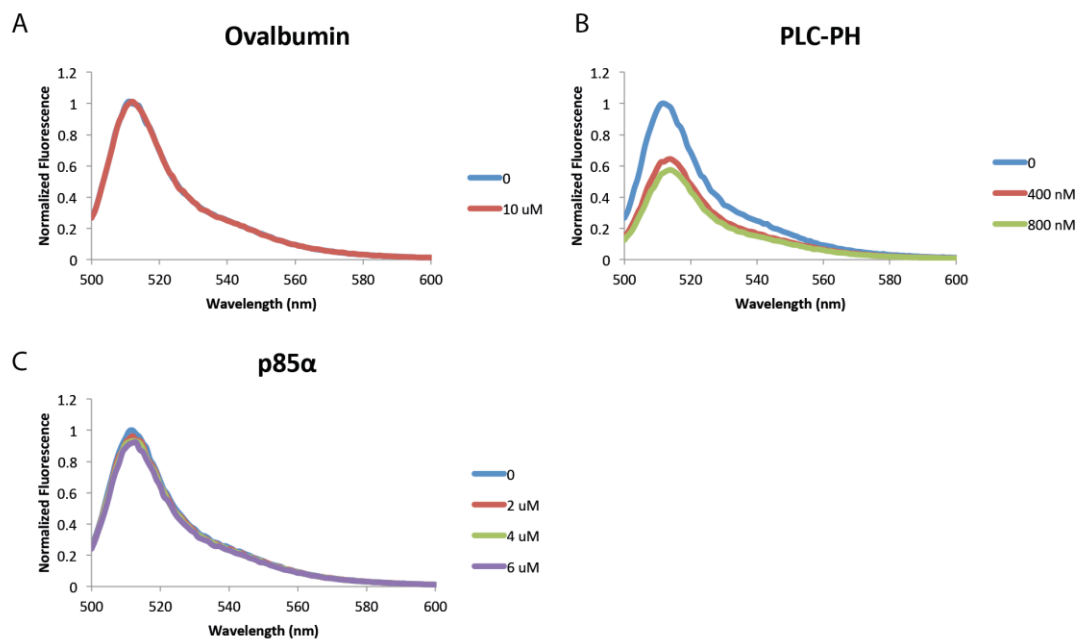

**Figure S4: Fluorescence quenching experiments.** Model membrane vesicles with 50 nM of BODIPY®-FL-PI(4,5)P<sub>2</sub>. The highest emission intensity is normalized to correspond to the vesicles alone. Each subsequent spectrum represents the incremental addition of the corresponding protein. All experiments were performed with N=3. Graphs shown are representative and present the data from a single experiment. (A) Ovalbumin does not quench the fluorescence signal. (B) Positive control of PLC $\delta$  (PLC- $\delta$ 1-PH Domain from Cayman Chemical). (C) p85 showed no quenching of the fluorescence signal at concentrations up to 6  $\mu\text{M}$ .

**Table S1: Table of interactions between p110 $\alpha$  and nSH2 domain.** Residues are colored according to the domains – C2 in green, helical in magenta, kinase in purple.

| p110 $\alpha$ residue | nSH2 domain residue | WT (4OVU) | H1047R (3HHM) |
|-----------------------|---------------------|-----------|---------------|
| Arg357                | Asp349              |           | +             |
| Gly364                | Asn377              |           | +             |
| Glu365                | Asn377              | +         | +             |
| Cys368                | Asp352              |           | +             |
| Cys368                | Gly375              |           | +             |
| Glu453                | Arg348              | +         | +             |
| Asp454                | Arg348              |           | +             |
| Asp454                | Asp349              | +         |               |
| Asp454                | Arg373              | +         |               |
| Leu455                | Asp349              | +         |               |
| Glu542                | Arg340              | +         | +             |
| Glu545                | Leu380              | +         | +             |
| Gln546                | Lys382              | +         | +             |
| Gln546                | Phe392              | +         | +             |
| Asp549                | Asn417              | +         | +             |
| Lys573                | Asn417              | +         |               |
| Lys573                | Lys419              | +         |               |
| Asn575                | Lys419              | +         |               |
| Asp1029               | Arg340              | +         |               |
| Arg1023               | Glu341              | +         |               |
